# Supplementary material for: Differences between gridded population data impact measures of geographic access to healthcare in sub-Saharan Africa
Source: Research Square preprint supplement (doi:10.21203/rs.3.rs-1514074/v1), 2022-04-28
Supplement: Supplementary file 1 [file 9843c0f2807e017e474fe431.docx]

| Gridded population dataset | Name dataset | Producer | Resolution | Year | Method | Covariates | Distribution | Citation |
| --- | --- | --- | --- | --- | --- | --- | --- | --- |
| **GHS-POP** | GHS POP MT GLOBE R2019A | European Commission, Joint Research Centre (JRC) | 250m (World Mollweide) | 2015 | Binary dasymetric. Population is proportionally redistributed to built-up areas from the Global Human Settlement Layer Built-Up Extent (GHS-BUILT), extracted from 30m Landsat imagery. | Built-up areas from the GHS-BUILT | Open access (Creative commons Attribution 4.0 International License) | 11 |
| **GPWv4** | UN WPP-Adjusted Population Count, v4.11 | CIESN, Columbia University | 30 arc-second (approximately 1km) | 2020 | Aerial weighting. Equal redistribution of census within administrative boundaries | Protected areas and water bodies | Open access (Creative commons Attribution 4.0 International License) | 12 |
| **Landscan** | Landscan Global Population Database | Oak Ridge National Laboratory | 30 arc-second (approximately 1km) | 2018 | Multivariable dasymetric mapping witg 4 covariates to estimate the 24h average ambient population | Roads, land cover, built structures, cities or urban areas infrastructure, environmental data, protected areas and water bodies. | Open access for academic research, humanitarian purposees, and for US government agencies or staff. Commercial license available for other entities. | 10 |
| **HRSL** | High Resolution Settlement Layer | Facebook Connectivity Lab and CIESN | 1 arc-second (approximately 30m) | 2015 | Binary dasymetric. Population is redistributed to cells with built structures as extracted from 0.5m Maxar imagery (0.5m resolution). | Built structures | Open access | 14 |
| **WorldPop** | Constrained (top-down) | WorldPop, University of Southampton | 3 arc-second (approximately 100m) | 2020 | Random Forest model with 24 covariates and binary dasymetric reallocation of population constrained to cells with settlements. | Roads, land cover, built structures, cities or urban areas, nighttime lights, infrastructure, environmental data, protected areas and water bodies. Constrained to built structures. | Open access | 13 |
| Unconstrained (top-down) | WorldPop, University of Southampton | 3 arc-second (approximately 100m) | 2020 | Random Forest model with 24 covariates and dasymetric redistribution. | Roads, land cover, built structures, cities or urban areas, nighttime lights, infrastructure, environmental data, protected areas and water bodies. | Open access | 13 |

**Supplementary Table 1 –** Description of gridded population datasets as adapted from18, 19, 66.

| Country | HRSL | GHS-POP | GPWv4 | Landscan | WorldPop constrained | WorldPop unconstrained |
| --- | --- | --- | --- | --- | --- | --- |
| Angola | 84 | 91.1 | 62.7 | 74.6 | 85.2 | 77.1 |
| Benin | 96.3 | 97.9 | 82.2 | 95.9 | 93.7 | 88.8 |
| Botswana | 97.5 | 96.9 | 57.6 | 93.8 | 95.8 | 81.2 |
| Burkina Faso | 91.1 | 93.2 | 79.5 | 88.7 | 88.2 | 84.6 |
| Burundi | 99.9 | 98.8 | 98.2 | 99.2 | 99.9 | 98.6 |
| Cameroon | 96.9 | 97.7 | 69.8 | 94.1 | 95.7 | 84.6 |
| Cape Verde |  | 99.6 | 98.5 | 99.6 | 99.1 | 98.9 |
| Central African Republic | 93.5 | 94.3 | 49.4 | 85.9 | 92.1 | 75.4 |
| Chad | 73.8 | 87.7 | 44.7 | 74.1 | 66.9 | 53.4 |
| Comoros | 99.9 | 99.9 | 80.2 | 100 | 99.5 | 89.1 |
| Côte d'Ivoire | 96 | 98 | 82.1 | 95.7 | 93.9 | 89.9 |
| Democratic Republic of the Congo | 93.5 | 95.4 | 57 | 89.1 | 90.2 | 79.3 |
| Djibouti | 96.8 | 90.8 | 64.8 | 94.1 | 89.1 | 79.4 |
| Equatorial Guinea | 96.1 | 97.5 | 39.6 | 82.8 | 94.3 | 49.5 |
| Eritrea | 81.9 | 75.5 | 40.9 | 79.7 | 68.5 | 62.5 |
| Ethiopia |  | 94.2 | 70.4 | 89.9 | 83.6 | 80.7 |
| Gabon | 94.4 | 94.6 | 46.2 | 90.5 | 93.7 | 54.6 |
| Gambia | 72 | 80.9 | 54.9 | 72.2 | 72.1 | 66.3 |
| Ghana | 98.3 | 98.8 | 88.2 | 97.5 | 96.3 | 93.5 |
| Guinea | 94.2 | 95.6 | 75.8 | 90.7 | 92.6 | 84.5 |
| Guinea-Bissau | 62.1 | 66.5 | 47.7 | 59.2 | 61.4 | 52.4 |
| Kenya | 97.3 | 93.1 | 90.3 | 94.7 | 95.1 | 92.1 |
| Lesotho | 99.2 | 97 | 90.9 | 96.9 | 98.4 | 92.8 |
| Liberia | 93.9 | 94 | 69.3 | 89.5 | 89.4 | 77.2 |
| Madagascar | 75.1 | 69.9 | 58.7 | 76.6 | 68.7 | 65 |
| Malawi | 99.5 | 97.5 | 97.6 | 97.5 | 99.1 | 97.4 |
| Mali | 92.5 | 89.7 | 83.1 | 89.3 | 91.9 | 87.2 |
| Mauritania | 79.9 | 77.3 | 61 | 72 | 74.3 | 71.2 |
| Mauritius | 98.1 | 97.9 | 96.9 | 98.1 | 98 | 97 |
| Mozambique | 85.9 | 85.8 | 63.4 | 79.8 | 83.6 | 76.1 |
| Namibia | 87.3 | 84.2 | 82.6 | 83 | 87 | 86.7 |
| Niger | 85.6 | 87.5 | 68.5 | 82.3 | 82.8 | 78.8 |
| Nigeria | 97.7 | 96.5 | 89.4 | 96.9 | 97 | 93.5 |
| Republic of Congo | 90.5 | 93.1 | 34.6 | 89.9 | 79.3 | 41.6 |
| Rwanda | 99.5 | 98.3 | 96.6 | 97.3 | 99.3 | 97.3 |
| Sao Tome and Principe | 99.3 | 96.9 | 90.1 | 99.7 | 99 | 91.1 |
| Senegal | 95.5 | 97.4 | 82.9 | 94.4 | 95.2 | 89.5 |
| Seychelles | 98.5 | 98.9 | 94.9 | 98.9 | 97.7 | 95.9 |
| Sierra Leone | 97.9 | 95.7 | 89 | 95.4 | 96.5 | 92.9 |
| Somalia | 100 | 86 | 62.6 | 81.8 | 84.3 | 70.5 |
| South Africa | 99.6 | 99.1 | 98.7 | 98 | 99.5 | 99.2 |
| South Sudan |  | 80.9 | 35.5 | 80.2 | 82 | 43.7 |
| Sudan |  | 54.6 | 18.8 | 46.2 | 40.7 | 33.2 |
| Swaziland | 99.6 | 90.9 | 96.9 | 98.6 | 99.5 | 97.2 |
| Tanzania | 96.1 | 93.3 | 86.7 | 94.2 | 95.1 | 91.7 |
| Togo | 97.9 | 97.5 | 89.6 | 96.7 | 97 | 93.9 |
| Uganda | 99.1 | 97.4 | 93.7 | 97.5 | 98.6 | 96.1 |
| Zambia | 89.3 | 89.7 | 64.5 | 86.5 | 86.7 | 76.4 |
| Zimbabwe | 97.9 | 88.1 | 89.6 | 96.7 | 97.4 | 93.6 |

**Supplementary Table 2 –** Relative accessibility coverage per country (1-hour travel time)

|  | Haut-Katanga | | | Haut-Lomami | | | Ituri | | | Kasaï | | | Kasaï-Oriental | | | Lomami | | | Sud-Kivu | | |
| --- | --- | --- | --- | --- | --- | --- | --- | --- | --- | --- | --- | --- | --- | --- | --- | --- | --- | --- | --- | --- | --- |
|  | nr. covered | %  covered | %  barrier | nr. covered | %  covered | %  barrier | nr. covered | %  covered | %  barrier | nr. covered | %  covered | %  barrier | nr. covered | %  covered | %  barrier | nr. covered | %  covered | %  barrier | nr. covered | %  covered | %  barrier |
| HRSL | 5,747,046 | 95.5 | 0.2 | 4,023,749 | 90.1 | 0.2 | 4,380,453 | 98.9 | 0.4 | 3,688,383 | 92.7 | 0.3 | 3,909,065 | 98.9 | 0.1 | 2,767,965 | 95.4 | 0 | 4,362,380 | 95.8 | 1.5 |
| GHS-POP | 5,789,005 | 98.3 | 0.8 | 4,023,916 | 92.1 | 0.3 | 4,320,053 | 99.4 | 0.5 | 3,684,768 | 93.7 | 0.6 | 3,858,273 | 99.4 | 0.4 | 2,697,294 | 94.8 | 0.2 | 4,221,054 | 94.5 | 4.8 |
| GPWv4 | 5,263,534 | 63.8 | 1 | 2,560,661 | 41.6 | 0.9 | 3,782,259 | 77.6 | 1.2 | 1,995,482 | 40.4 | 0.7 | 4,084,164 | 92.7 | 3.5 | 2,302,284 | 71.2 | 0.9 | 3,227,441 | 65.6 | 3.3 |
| GRID3 | 4,580,262 | 93.3 | 0.2 | 2,275,209 | 84.3 | 0.6 | 5,058,822 | 97.6 | 0.5 | 2,650,634 | 89.5 | 0.5 | 2,176,677 | 96.6 | 0.2 | 2,551,022 | 93.5 | 0 | 4,575,325 | 96.3 | 1.3 |
| Landscan | 3,076,949 | 93.7 | 0.7 | 1,678,176 | 80 | 0.8 | 5,132,628 | 97.8 | 1.1 | 3,030,880 | 85.7 | 0.6 | 3,394,953 | 97.5 | 1.1 | 2,755,803 | 93.6 | 0.2 | 5,807,295 | 87.5 | 5.7 |
| WorldPop constrained | 7,545,390 | 89.7 | 0.4 | 5,253,516 | 84 | 0.6 | 4,727,189 | 96.8 | 0.5 | 4,368,401 | 88.4 | 0.4 | 4,371,462 | 98.3 | 0.2 | 3,019,200 | 92.5 | 0.1 | 4,662,320 | 94.8 | 1.3 |
| WorldPop unconstrained | 7,167,589 | 85 | 1.1 | 4,145,649 | 66.3 | 0.8 | 4,542,688 | 93.1 | 1 | 3,688,820 | 74.7 | 0.5 | 4,389,662 | 97.2 | 1.4 | 2,856,164 | 87.4 | 0.6 | 4,238,609 | 86.2 | 2.2 |

**Supplementary Table 3 –** Comparison of accessibility coverage estimatesfor seven provinces in the Democratic Republic of the Congo for which bottom-up estimates were recently released. For each province we indicated the absolute number of people covered in 1-hour travel time, the relative number of people covered, and the percentage of the population falling on barriers (i.e. rivers and lakes).

| Country code | Country name | EPSG code | Projection |
| --- | --- | --- | --- |
| AGO | Angola | 22033 | Camacupa 1948 / UTM zone 33S |
| BDI | Burundi | 32736 | WGS 84 / UTM zone 36S |
| BEN | Benin | 32631 | WGS 84 / UTM zone 31N |
| BFA | Burkina Faso | 32630 | WGS 84 / UTM zone 30N |
| BWA | Botswana | 20934 | Arc 1950 / UTM zone 34S |
| CAF | Central African Republic | 32635 | WGS 84 / UTM zone 35N |
| CIV | Côte d'Ivoire | 2043 | Abidjan 1987 / UTM zone 29N |
| CMR | Cameroon | 2215 | Manoca 1962 / UTM zone 32N |
| COD | Democratic Republic of the Congo | 7992 | Malongo 1987 / UTM zone 33S |
| COG | Republic of Congo | 7992 | Malongo 1987 / UTM zone 33S |
| COM | Comoros | 2999 | Grand Comoros / UTM zone 38S |
| CPV | Cape Verde | 4826 | WGS 84 / Cape Verde National |
| DJI | Djibouti | 32637 | WGS 84 / UTM zone 37N |
| DZA | Algeria | 30729 | Nord Sahara 1959 / UTM zone 29N |
| EGY | Egypt | 32637 | WGS 84 / UTM zone 37N |
| ERI | Eritrea | 26237 | Massawa / UTM zone 37N |
| ESH | Western Sahara | 26195 | Merchich / Sahara Sud |
| ETH | Ethiopia | 20138 | Adindan / UTM zone 38N |
| GAB | Gabon | 26692 | M'poraloko / UTM zone 32S |
| GHA | Ghana | 2136 | Accra / Ghana National Grid |
| GIN | Guinea | 3462 | Dabola 1981 / UTM zone 29N |
| GMB | Gambia | 6894 | Gambia |
| GNB | Guinea-Bissau | 2095 | Bissau / UTM zone 28N |
| GNQ | Equatorial Guinea | 6883 | Bioko |
| KEN | Kenya | 21097 | Arc 1960 / UTM zone 37N |
| LBR | Liberia | 4251 | Liberia 1964 |
| LBY | Libya | 3177 | LGD2006 / Libya TM |
| LSO | Lesotho | 4222 | Cape |
| MAR | Morocco | 4261 | Merchich |
| MDG | Madagascar | 29739 | Tananarive / UTM zone 39S |
| MLI | Mali | 32630 | WGS 84 / UTM zone 30N |
| MOZ | Mozambique | 5629 | Moznet / UTM zone 38S |
| MRT | Mauritania | 3345 | Mauritania 1999 / UTM zone 30N |
| MUS | Mauritius | 3337 | Le Pouce 1934 / Mauritius Grid |
| MWI | Malawi | 20936 | Arc 1950 / UTM zone 36S |
| NAM | Namibia | 29333 | Schwarzeck / UTM zone 33S |
| NER | Niger | 2931 | Beduaram / TM 13 NE |
| NGA | Nigeria | 4263 | Minna |
| RWA | Rwanda | 32736 | WGS 84 / UTM zone 36S |
| SDN | Sudan | 20135 | Adindan / UTM zone 35N |
| SEN | Senegal | 31028 | Yoff / UTM zone 28N |
| SLE | Sierra Leone | 2162 | Sierra Leone 1968 / UTM zone 29N |
| SOM | Somalia | 20539 | Afgooye / UTM zone 39N |
| SSD | South Sudan | 20135 | Adindan / UTM zone 35N |
| STP | São Tomé and Príncipe | 4823 | Sao Tome |
| SWZ | Swaziland | 22291 | Cape / Lo31 |
| SYC | Seychelles | 6915 | South East Island 1943 / UTM zone 40N |
| TCD | Chad | 32434 | WGS 72BE / UTM zone 34N |
| TGO | Togo | 25231 | Lome / UTM zone 31N |
| TUN | Tunisia | 22332 | Carthage / UTM zone 32N |
| TZA | Tanzania | 21037 | Arc 1960 / UTM zone 37S |
| UGA | Uganda | 21095 | Arc 1960 / UTM zone 35N |
| ZAF | South Africa | 22293 | Cape / Lo33 |
| ZMB | Zambia | 20934 | Arc 1950 / UTM zone 34S |
| ZWE | Zimbabwe | 20936 | Arc 1950 / UTM zone 36S |

**Supplementary Table 4 –** Country spatial projection system

**
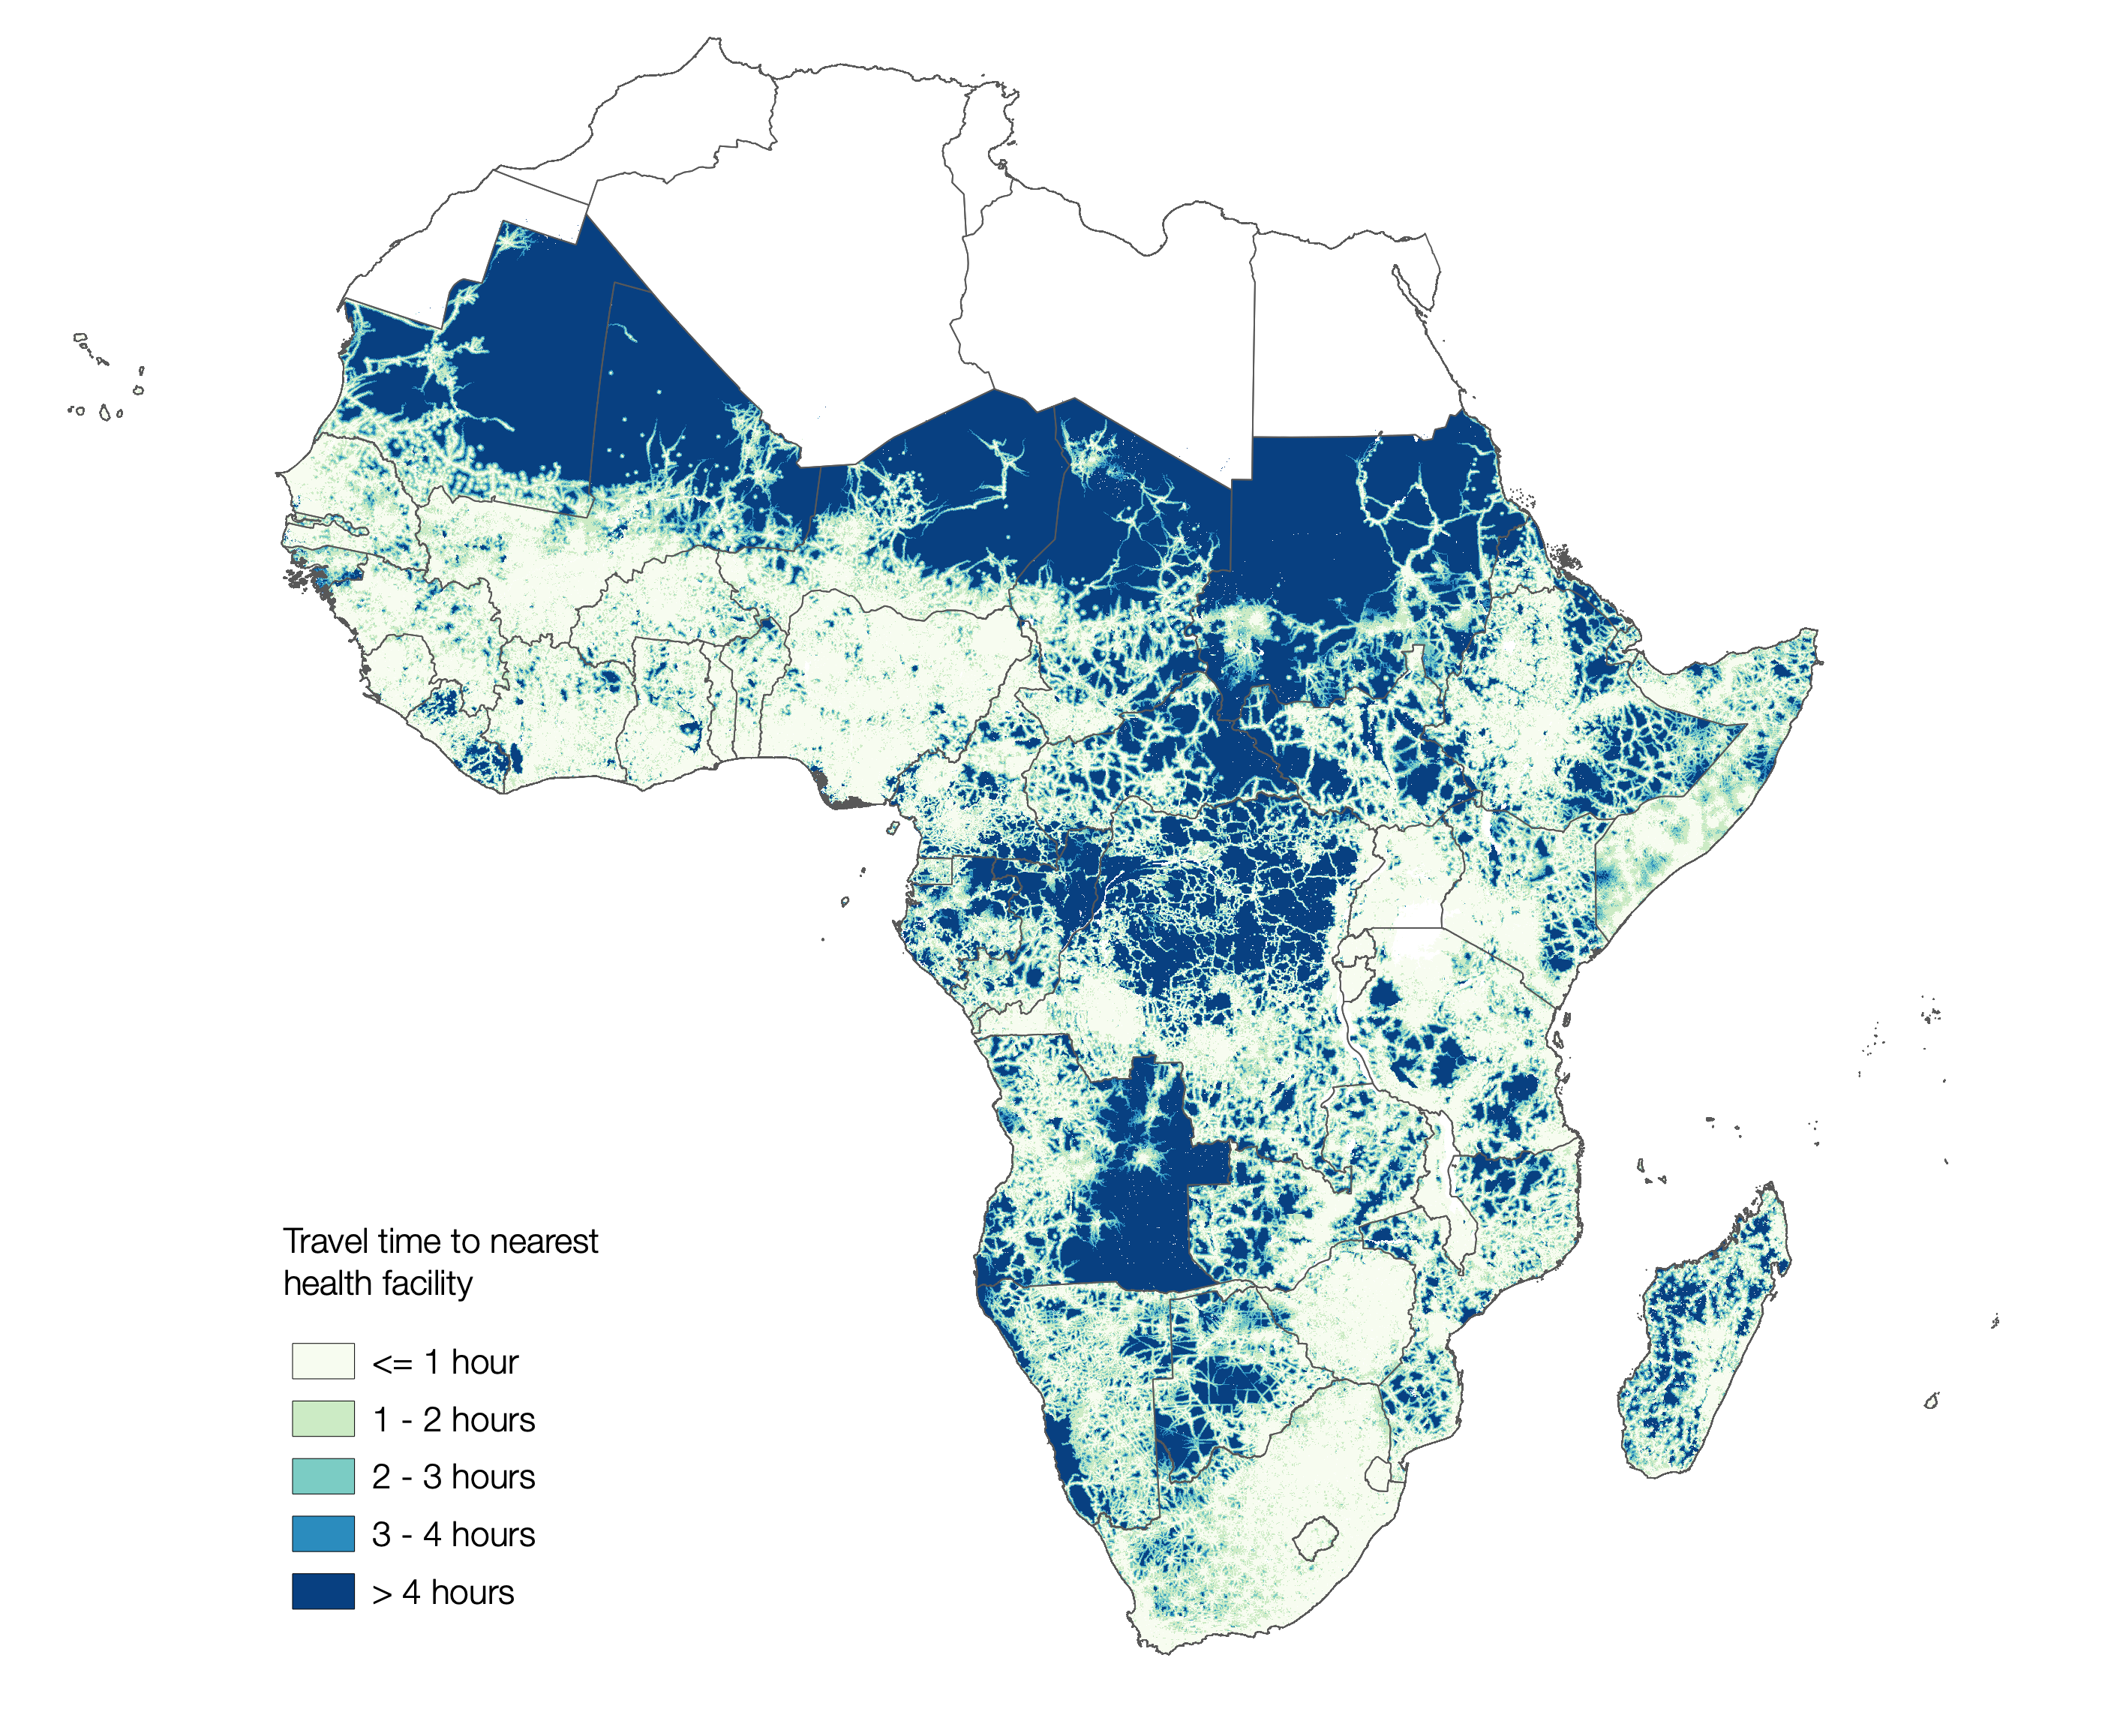
**

**Supplementary Figure 1** – Travel time to nearest health facilities in sub-Saharan Africa

***Travel time to health facilities***

The map in Supplementary 1 shows the spatial heterogeneity travel time to the nearest health facility (considering walking and motorized transport) for the first time at a resolution of 100 meters for sub-Saharan Africa. Patterns of travel time vary widely, with a tendency toward higher travel times in northern sub-Saharan Africa, central Africa and eastern Democratic Republic of the Congo. Similar patterns of accessibility have also been observed in previous research34, 43. We would like to stipulate that widescale assumptions on travel speeds and modes have been made to construct the national maps of travel time to healthcare. These assumptions may not correspond to local realities of health seeking behavior. We therefore recognize that these maps should not be used for informed health system planning.


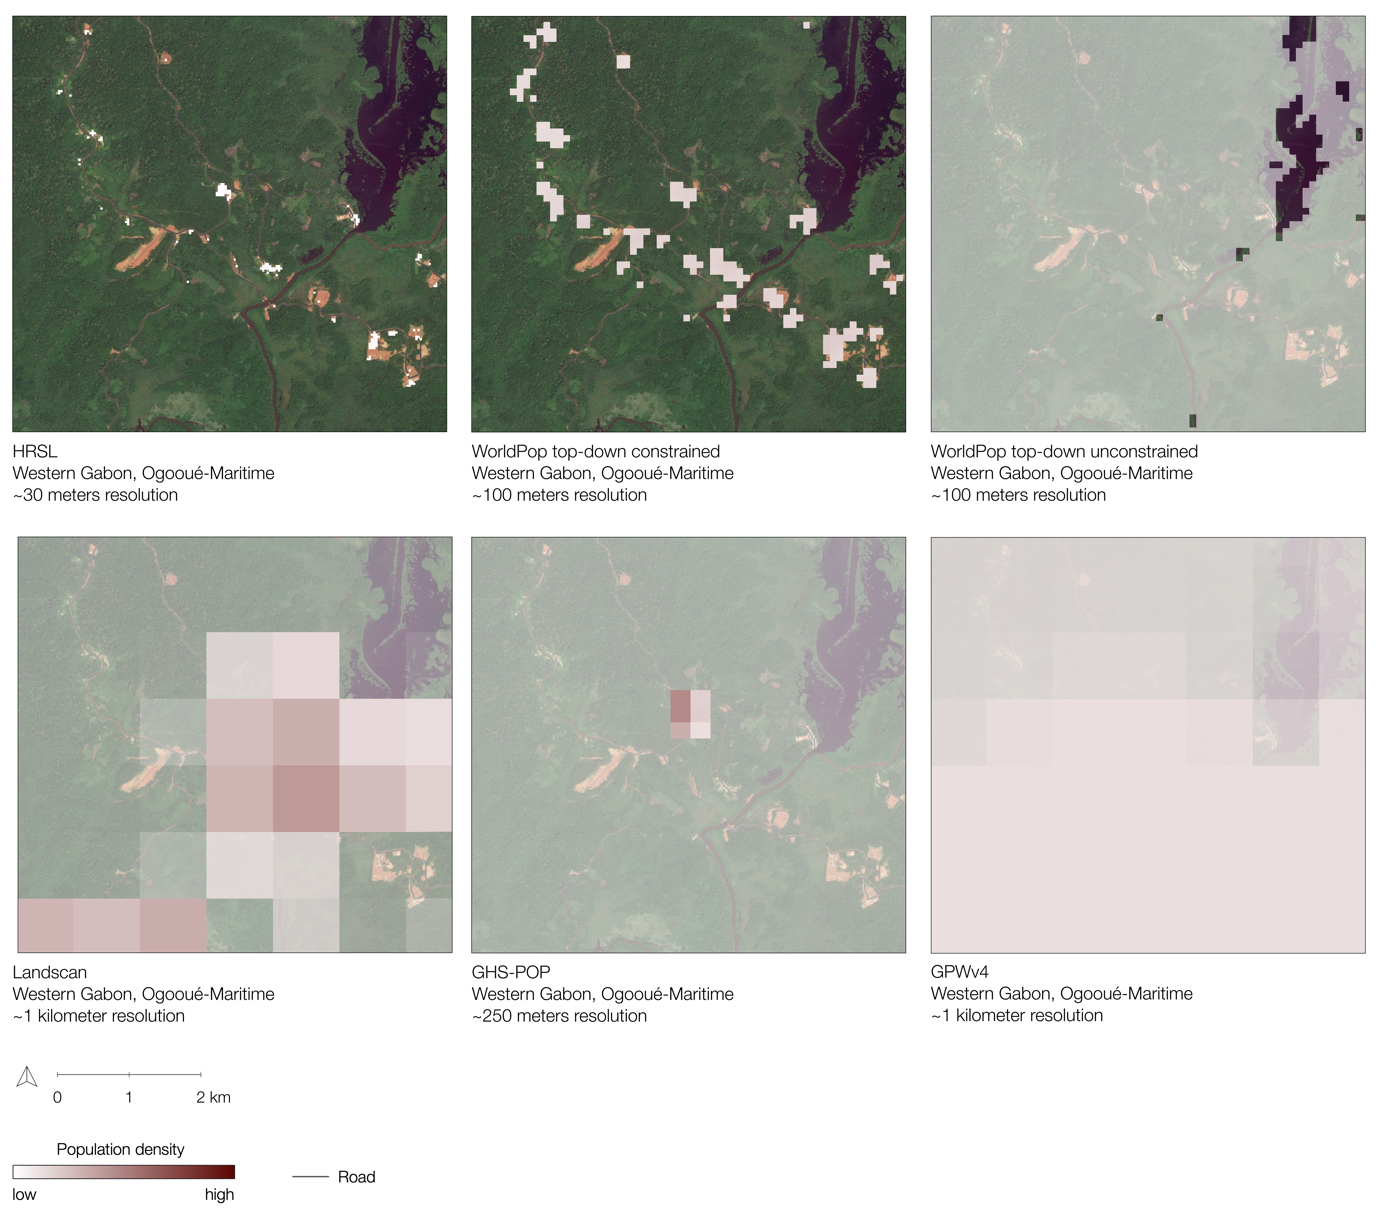


**Supplementary Figure 2** – Example of all datasets in Western Gabon, Ogooué-Maritime


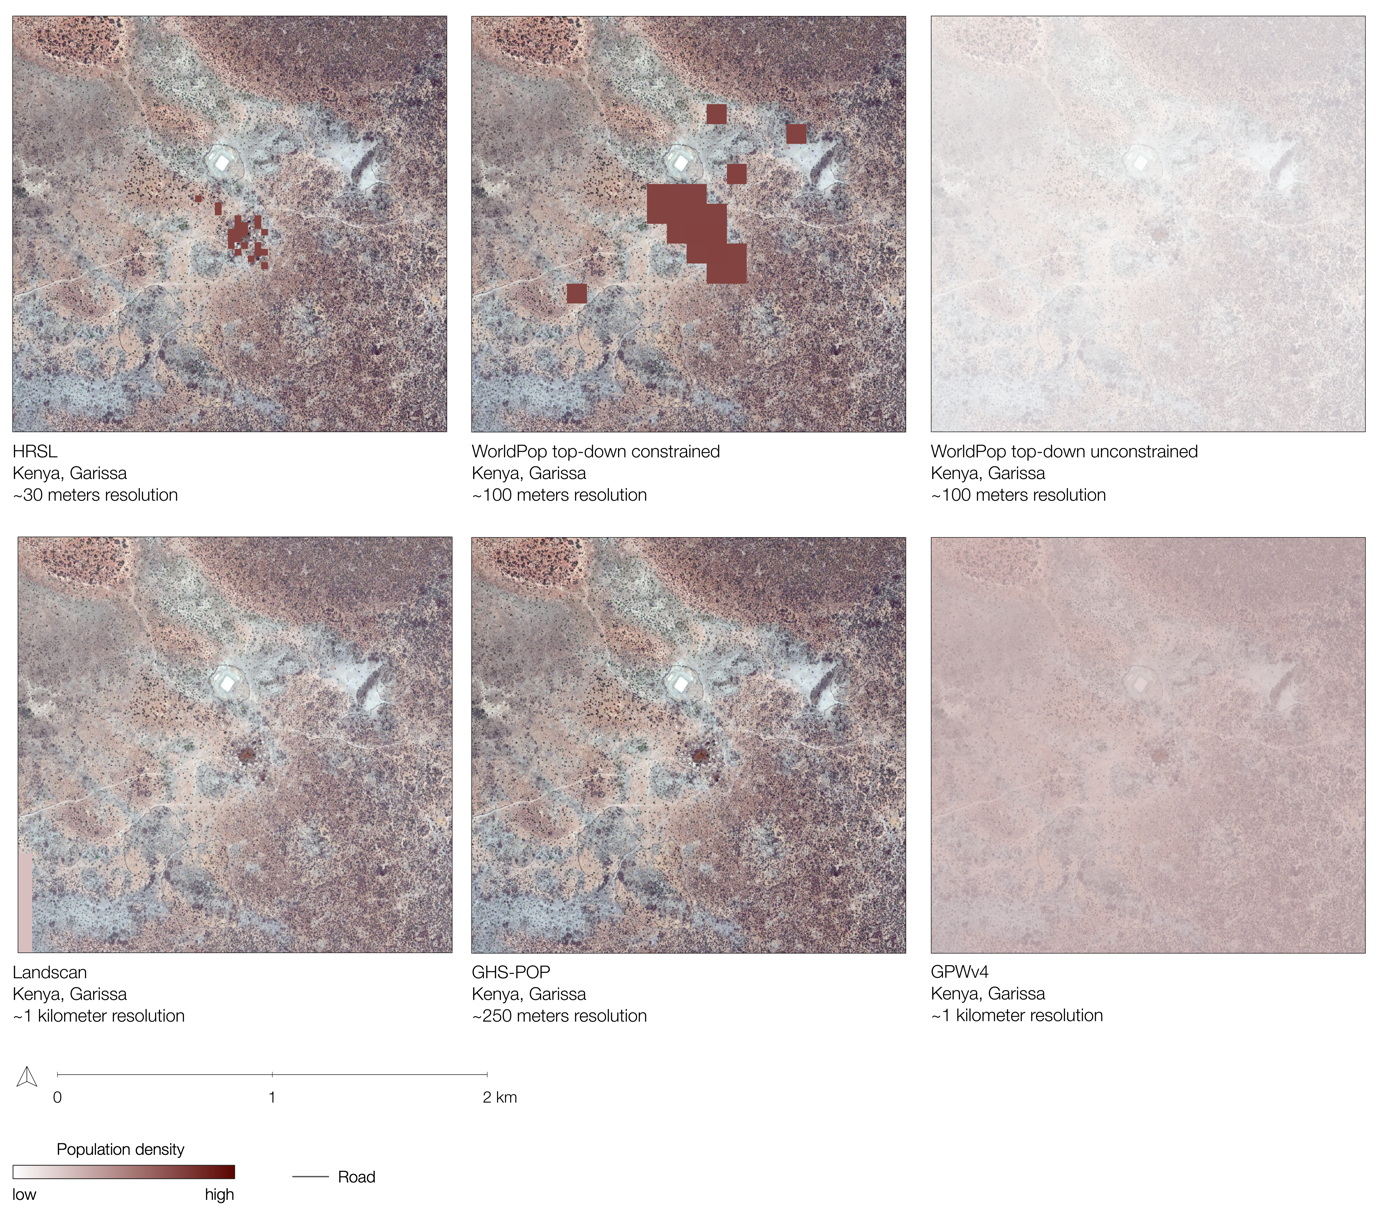


**Supplementary Figure 3** – Example of all datasets in Garissa, Kenya.


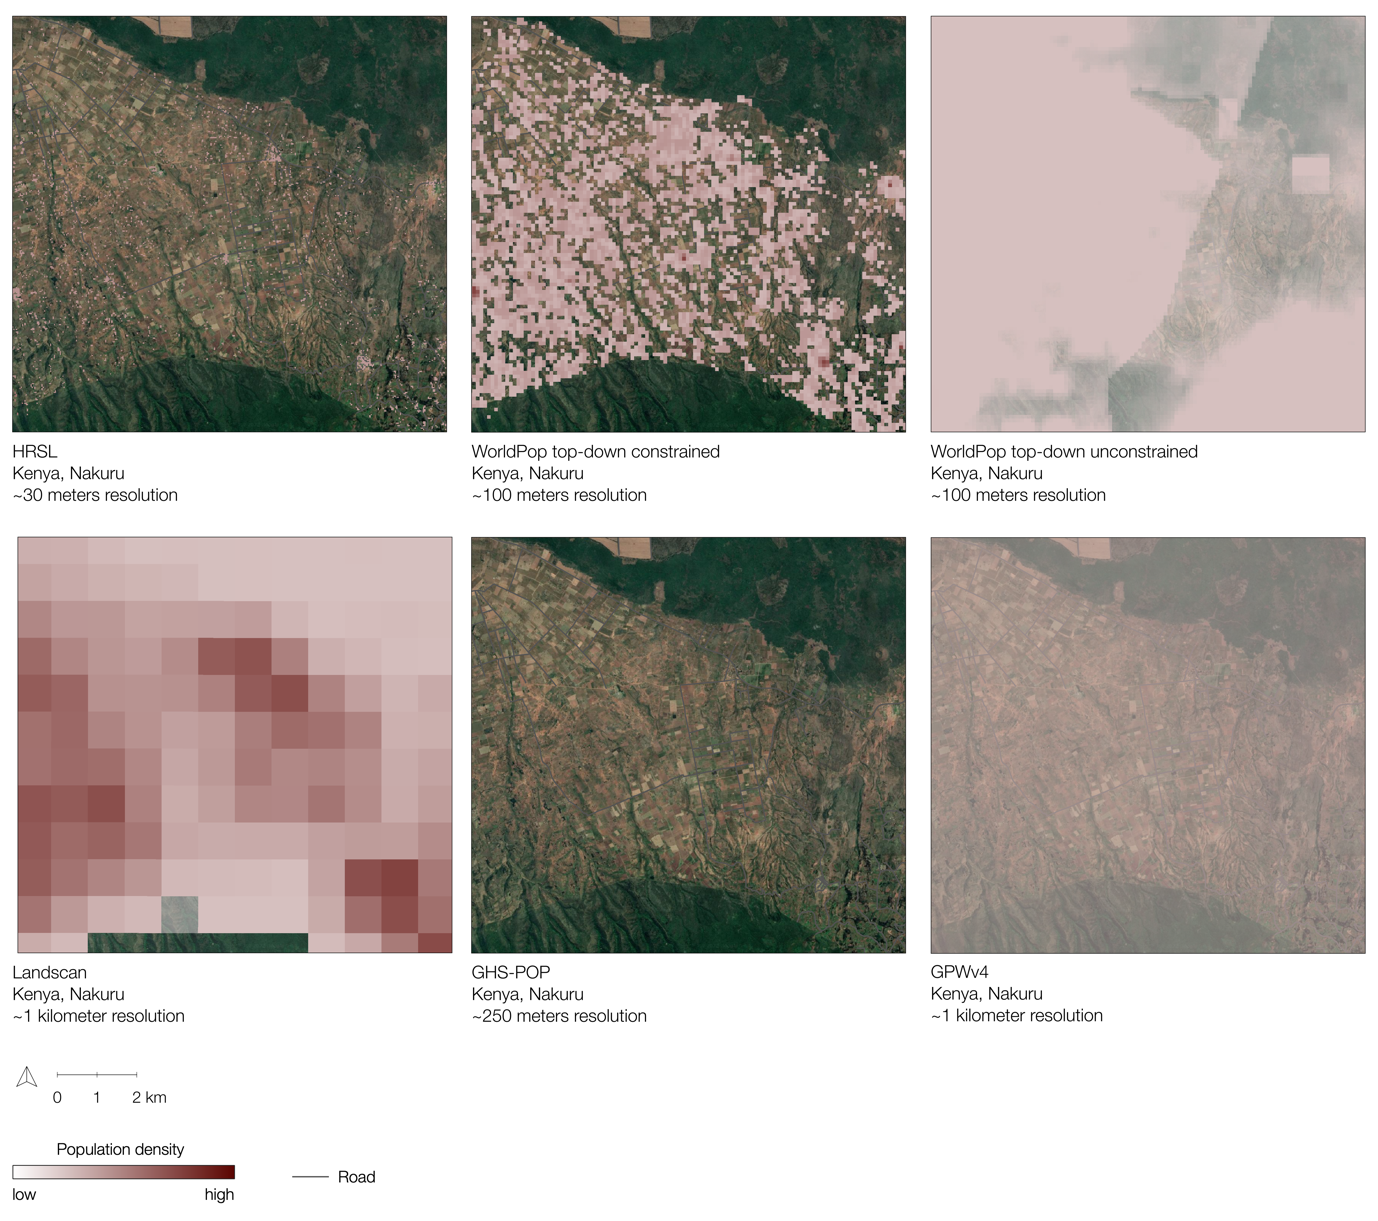


**Supplementary Figure 4** – Example of all datasets in Nakuru, Kenya.


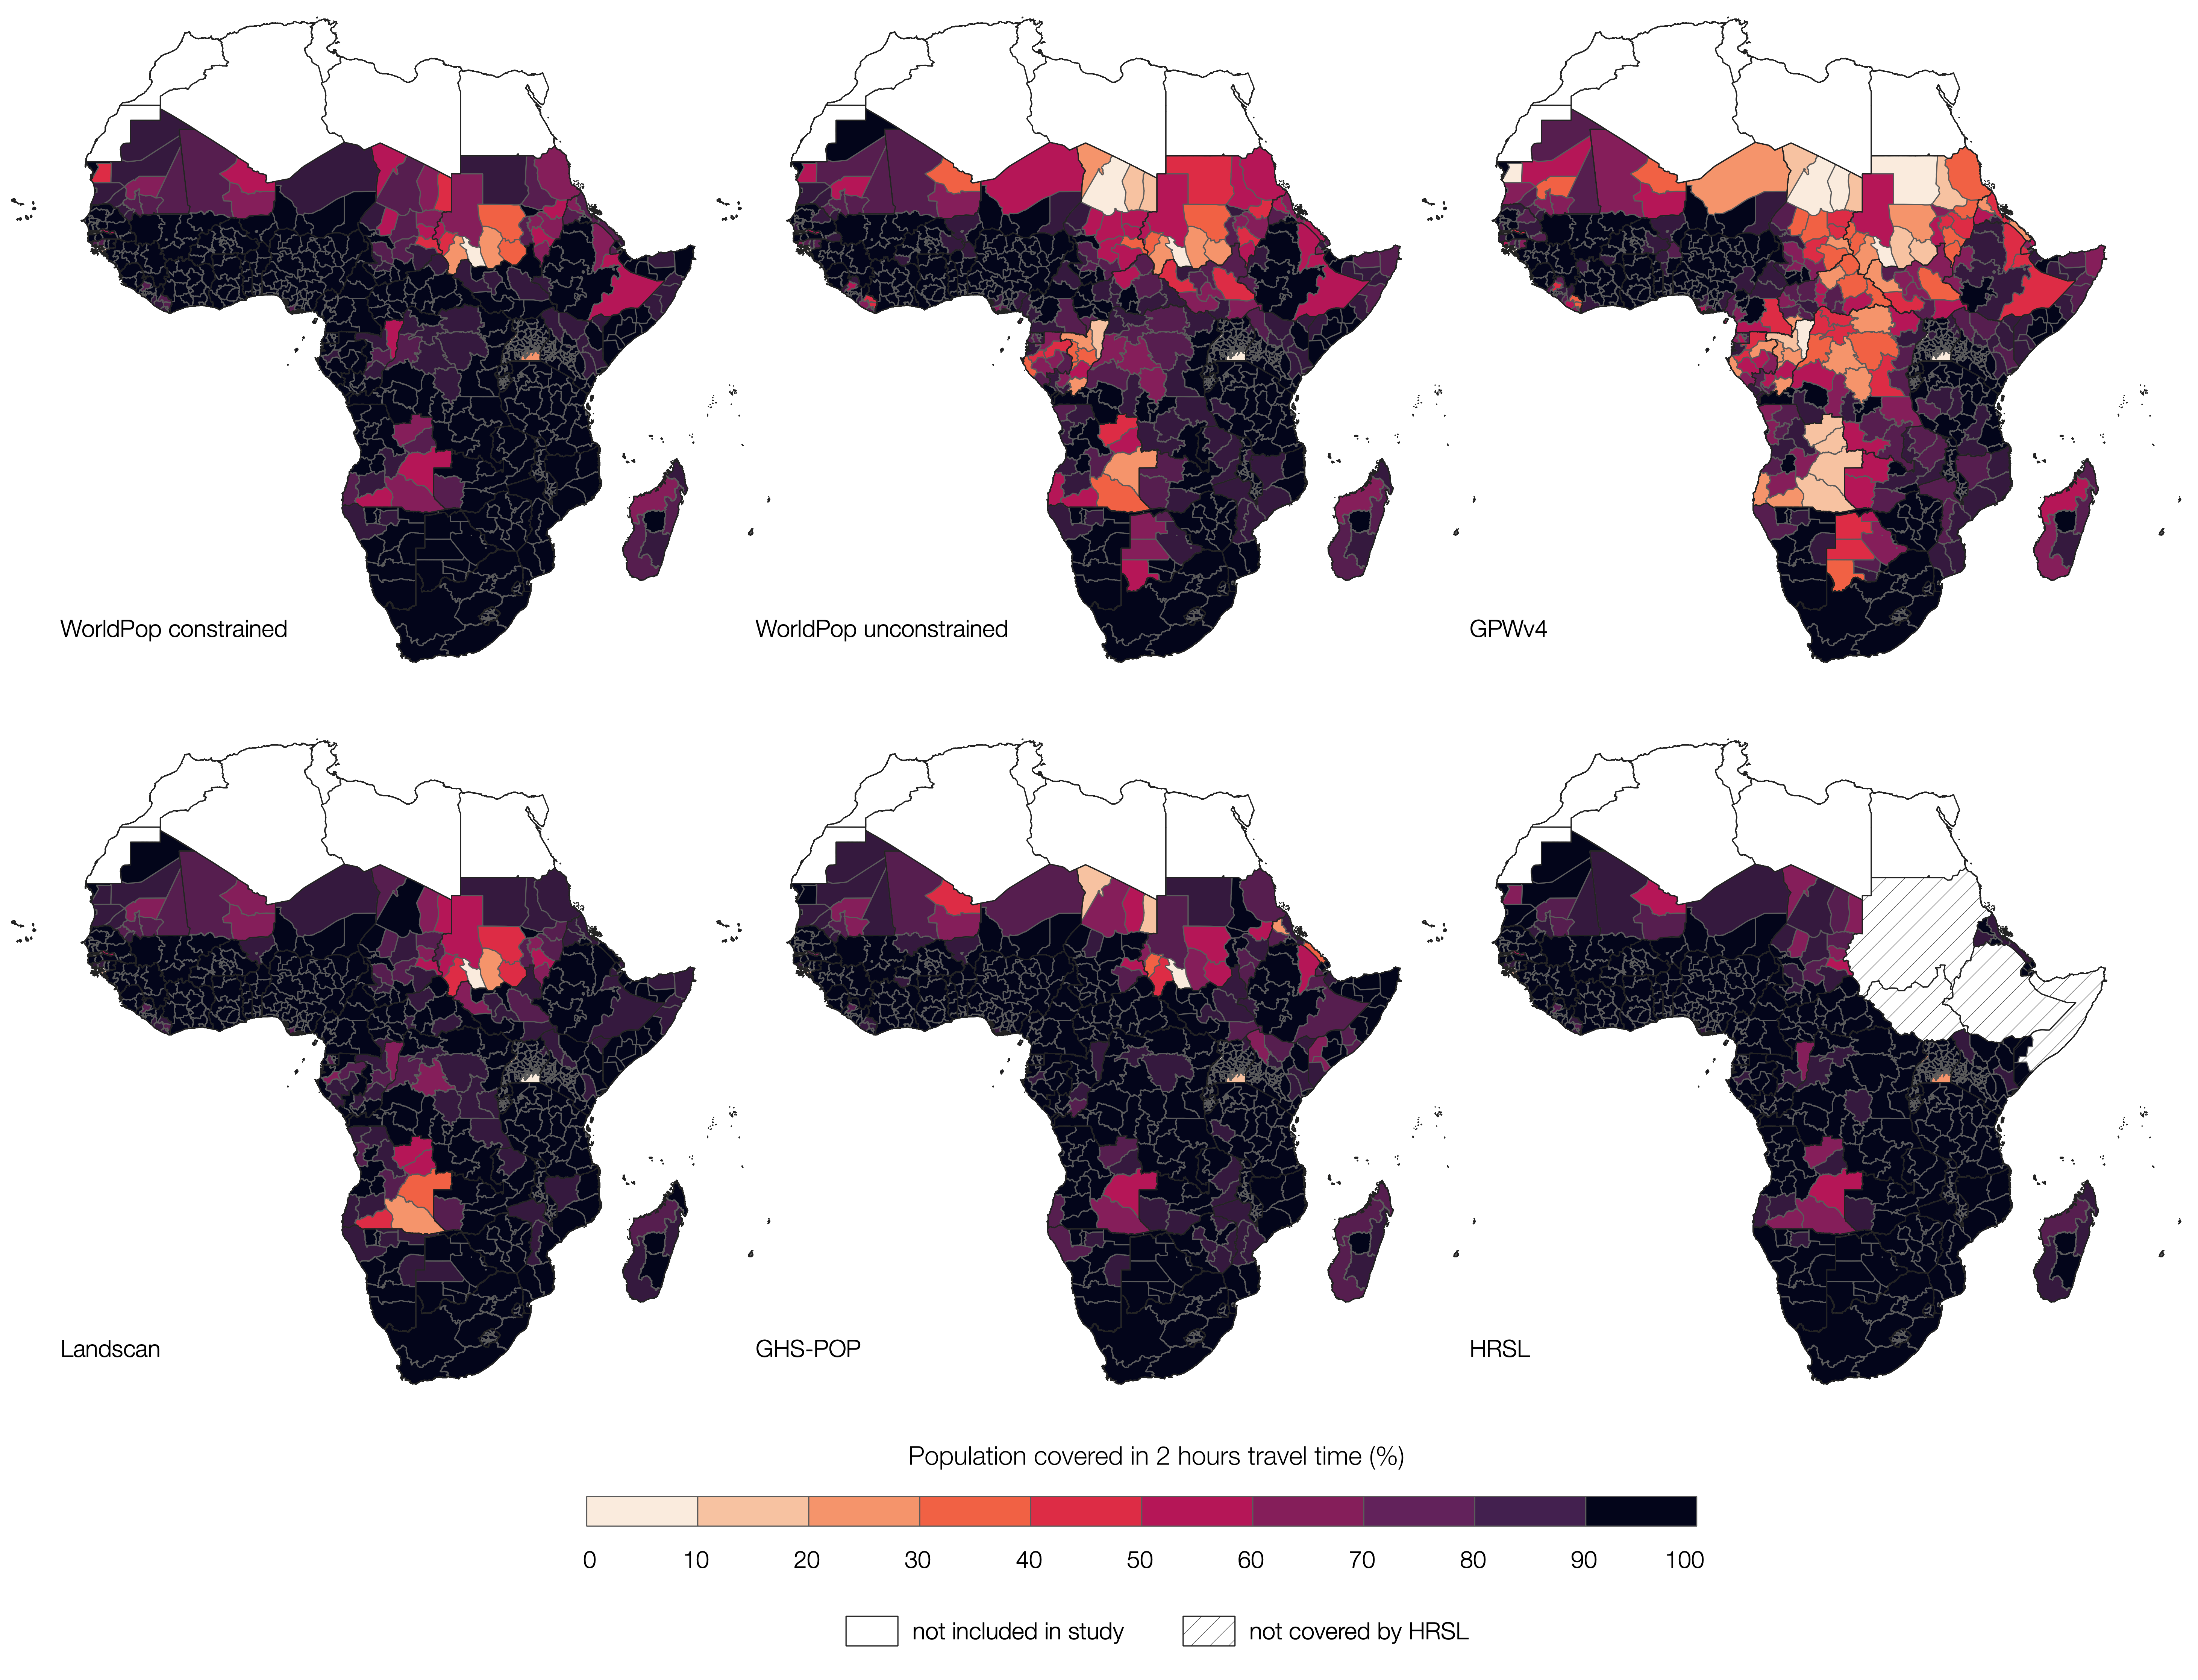


**Supplementary Figure 5** – Zonal statistics of accessibility coverage at 2-hours travel time at administrative level 1 for sub-Saharan Africa. All 6 datasets can be compared.

**Supplementary Figure 6** – Visual overview of methodology with successive steps from left to right
